# Supplementary material for: Immunohistochemical Evaluation of FGD3 Expression: A New Strong Prognostic Factor in Invasive Breast Cancer
Source: MDPI journal article supplement (doi:10.3390/cancers13153824), 2021-07-29
Supplement: s1 [file s1]

# Supplementary Materials

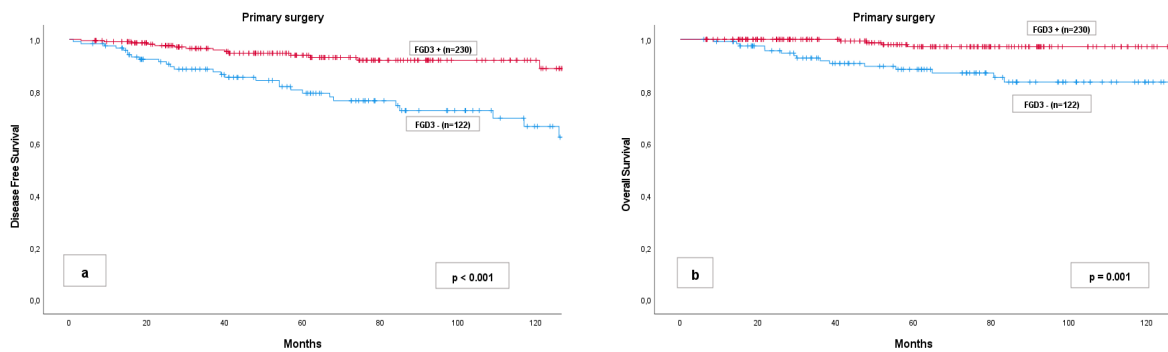

**Figure S1.** DFS (a) and OS (b) according to FGD3 expression in patients initially treated by surgery. Abbreviations: FGD3+: high FGD3 expression; FGD3-: low FGD3 expression.

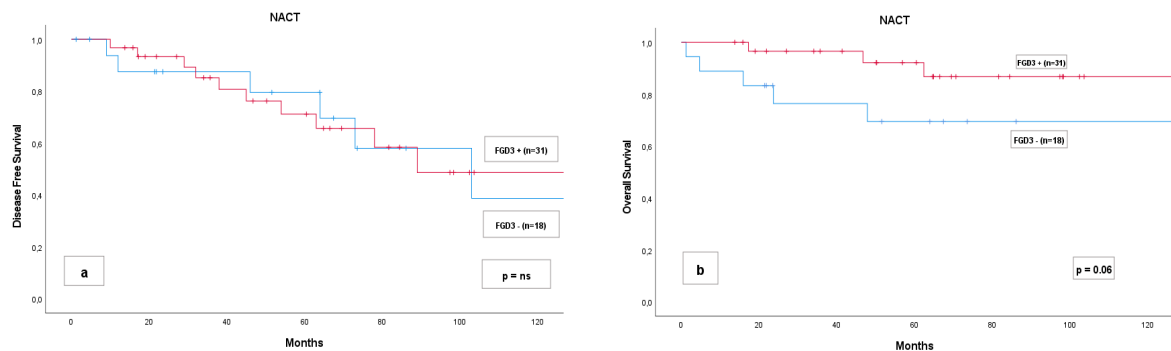

**Figure S2.** DFS (a) and OS (b) according to FGD3 expression in patients receiving neoadjuvant chemotherapy. Abbreviations: FGD3+: high FGD3 expression; FGD3-: low FGD3 expression.

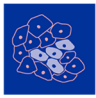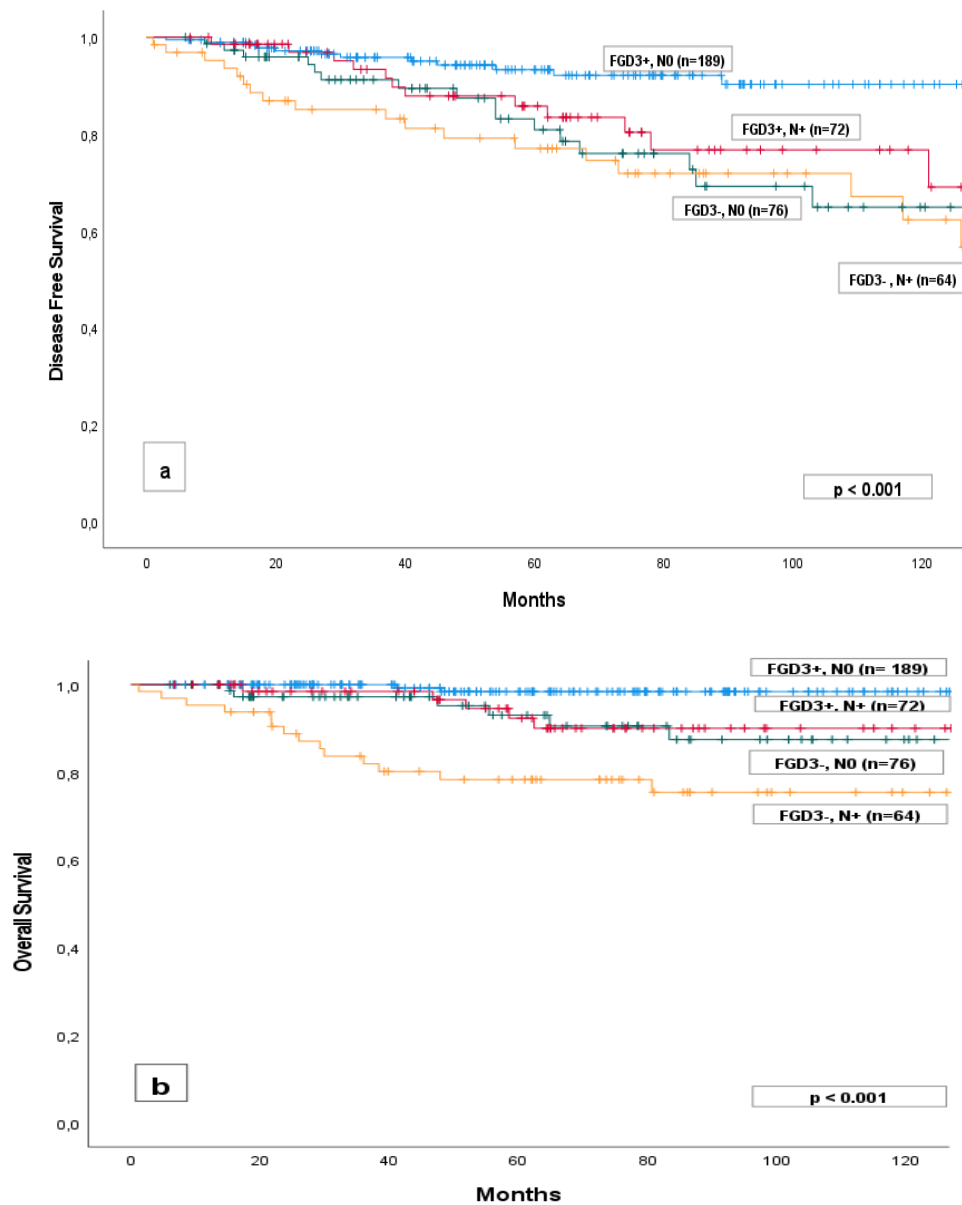

**Figure S3.** DFS (a) and OS (b) according to FGD3 expression and lymph node status stratified groups. Abbreviations: FGD3+: high FGD3 expression; FGD3-: low FGD3 expression; N0: lymph node negative patients; N+: lymph node positive patients.

a: FGD3+ N0 vs FGD3- N0:  $p < 0.001$ ; FGD3+ N0 vs FGD3+ N+:  $p = 0.01$ ; FGD3+ N0 vs FGD3- N+:  $p < 0.001$ ; FGD3- N0 vs FGD3+ N+:  $p = \text{n.s.}$ ; FGD3- N0 vs FGD3- N+:  $p = \text{n.s.}$ ; FGD3+ N+ vs FGD3- N+:  $p = \text{n.s.}$ ;

b: FGD3+ N0 vs FGD3- N0:  $p = 0.01$ ; FGD3+ N0 vs FGD3+ N+:  $p = 0.004$ ; FGD3+ N0 vs FGD3- N+:  $p < 0.001$ ; FGD3- N0 vs FGD3+ N+:  $p = \text{n.s.}$ ; FGD3- N0 vs FGD3- N+:  $p = 0.02$ ; FGD3+ N+ vs FGD3- N+:  $p = 0.03$ ;

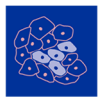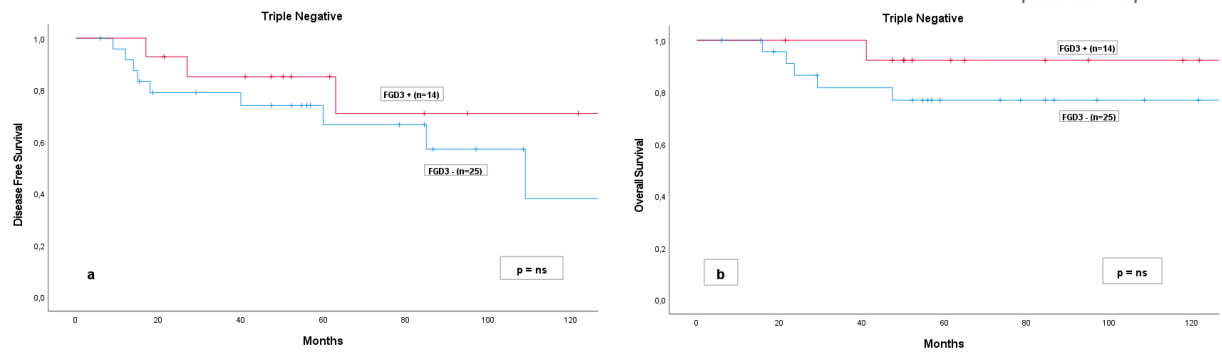

**Figure S4.** DFS (a) and OS (b) according to FGD3 expression in triple negative breast cancer patients. Abbreviations: FGD3+: high FGD3 expression; FGD3-: low FGD3 expression.
